# Supplementary material for: Intra- and inter-rater reliability of ultrasound measurements of the levator ani muscle thickness in and M-mode in asymptomatic individuals: a cross-sectional study
Source: PeerJ. 2025 Jun 24;13:e19427. doi: 10.7717/peerj.19427 (PMC12204087; doi:10.7717/peerj.19427)
Supplement: Supplemental Information 1 [file peerj-13-19427-s001.xlsx]

## Sheet: Sociodemographic Data
Age	Weight (Kg)	Height (cm)	Q1	Q2	Q3	Q4	Q5	Q6	Q7	Q8	Q9	Q10	Q11	Q12	Q14	Q15
19	71	176	No	Yes	yes	No	No	No	No	No	Sí	No	No	No	No
24	43	153	No	Yes	yes	No	No	No	No	yes	No	No	yes	No	No
22	67	167	No	Yes	yes	No	No	No	No	yes	No	No	No	No	No	No
21	64	168	No	Yes	yes	No	No	No	No	yes	No	No	No	No	No
24	53	170	No	Yes	yes	Sí	No	No	yes	yes	Sí	No	yes	yes	No
25	60	170	No	Yes	yes	No	No	No	No	yes	No	No	yes	yes	No	No
21	60	171	No	Yes	yes	No	No	No	No	No	No	No	yes	yes	No	No
24	53	170	No	Yes	yes	Sí	No	No	yes	yes	No	No	yes	yes	No
19	56	161	No	Yes	yes	No	No	No	No	yes	No	No	yes	yes	No	No
21	55	161	No	Yes	yes	No	No	No	No	No	No	No	yes	yes	No
19	67	169	No	Yes	yes	No	No	No	No	yes	Sí	No	yes	No	No	No
22	62	165	No	Yes	yes	Sí	No	No	No	yes	No	No	yes	No	No	No
21	60	164	No	Yes	yes	No	No	No	No	yes	No	No	yes	No	No
23	62	172	No	Yes	yes	No	No	No	No	No	No	No	yes	No	No
21	53	162	No	Yes	yes	Sí	No	No	No	No	No	No	yes	yes	No	No
22	58	157	No	Yes	yes	No	No	No	No	yes	No	Sí	yes	yes	No
21	60	172	No	Yes	yes	No	No	No	No	yes	No	No	yes	No	No
23	72	168	No	Yes	yes	No	No	No	No	yes	Sí	No	No	No	No
21	60	163	No	Yes	yes	Sí	No	No	No	yes	No	No	No	No	No
20	52	164	No	Yes	yes	No	No	No	No	yes	No	No	Sí	yes	No
22	62	165	No	Yes	yes	Sí	No	No	No	yes	No	No	Sí	No	No
18	50	162	No	Yes	yes	No	No	No	No	yes	Sí	No	Sí	yes	No	No
18	70	172	No	Yes	yes	No	No	No	No	yes	No	No	Sí	yes	No
21	65	171	No	Yes	yes	Sí	No	No	No	yes	No	No	Sí	No	No
23	65	171	No	Yes	yes	No	No	No	No	yes	No	No	No	No	No
25	55	162	No	Yes	yes	No	No	No	No	yes	No	No	Sí	yes	No	No
18	85	170	No	Yes	yes	No	No	No	No	No	No	No	Sí	No	No
18	56'5	167	No	Yes	yes	No	No	No	No	yes	No	No	No	No	No	yes
18	43	156	No	Yes	yes	No	No	No	No	yes	No	No	No	yes	No	No
22	61	164	No	Yes	yes	No	No	No	No	yes	No	No	Sí	yes	No
22	58	163	No	Yes	yes	No	No	No	No	yes	No	No	Sí	yes	No
18	57	164	No	Yes	yes	No	No	No	No	No	Sí	No	Sí	No	No	No
23	51	163	No	Yes	yes	No	No	No	yes	No	No	No	No	No	No	yes
25	50	167	No	Sí	yes	No	No	No	No	No	No	No	Sí	yes	No

## Sheet: legend
Legend
Q1	Have you had any pregnancies or births?
Q2	Are you able to understand the information requested in Spanish for this study?
Q3	Do you freely agree to participate in this study?
Q4	Have you undergone any surgery on your abdomen, pelvis, or lower limb?
Q5	Do you have any diagnosed urogynaecological conditions, such as urinary incontinence, chronic pelvic pain, etc.?
Q6	Do you currently have a urinary infection?
Q7	Do you suffer from any chronic illness or disability?
Q8	Do you engage in any physical activity (moderate aerobic physical activities for at least 150 to 300 minutes or intense aerobic physical activities for at least 75 to 150 minutes)?
Q9	Do you experience dysmenorrhea (severe and frequent pain associated with menstruation)? (severe pain: pain that is so debilitating that it prevents daily activities)
Q10	Do you experience dyspareunia (pain during penetrative sexual intercourse)?
Q11	Are you sexually active?
Q12	Are you undergoing any hormonal treatment?
Q13	Do you take any medication/substance that alters the behavior of the pelvic floor muscles, such as muscle relaxants, diuretics, antidepressants, antiepileptics, or anticholinergics?
Q14	Have you used any drugs in the last 6 months?

## Sheet: Evaluator 1
CODE	CMV1Thickness	CMV1Rise Time	CMV1Speed	CMV1Contraction/Fatigue time	CMV2Thickness	CMV2Rise Time	CMV2Speed	CMV2Contraction/Fatigue time	CMV3Thickness	CMV3Rise Time	CMV3Speed	CMV3Contraction/Fatigue time		Legend
SP_1_LL2000	0.37	0.28	0.65	2.49	0.37	0.44	4.6	1.64	0.43	0.41	0.25	2.69		CM = Maximal Contraction
SP_1_SRM2002	1.54	0.2	3.22	1.027	0.93	0.16	5.7	2.85	1.17	0.253	4.39	2.413		CR = Repeated Contractions
SP_1_CAM2002	0.93	0.28	0.93	2.33	0.99	0.33	1.7	2.25	0.86	0.48	1.41	6		Tra = Transverse Contractions
SP_1_EG2000	1.23	0.253	4.63	1.587	1.05	0.187	3.7	1.293	1.23	0.29	5.36	1.08		Epd = Right Lower Limb Elevation
SP_1_CPI1996	1.11	0.28	3.7	2.73	0.31	0.267	1.16	3.56	1.3	0.28	3.79	2.627
SP_1_NRZ1999	0.59	0.293	2.12	1.213	0.86	0.24	3.21	1.44	0.86	0.53	2.92	1.147
SP_1_EFP1999	0.69	0.293	2.41	4.227	0.44	0.293	1.65	2.747	0.44	0.267	1.62	3.347
SP_1_YEB1998	0.94	0.827	0.68	4.64	0.4	0.293	0.93	4.413	0.49	0.44	1.39	5.61
SP_1_EF1999	1.11	0.333	3.08	3.747	0.89	0.173	4.51	3.787	0.94	0.24	3.17	2.36
SP_1_MBV2003	1.05	0.36	3.42	1.773	0.99	0.4	1.88	1.053	0.8	0.973	0.69	4.627
SP_1_LRL2003	1	0.213	3.39	0.667	0.83	0.227	4.43	0.613	0.89	0.253	4.66	0.547
SP_1_ARC2003	0.67	0.253	3.43	1.013	1	0.2	5.45	1.093	0.72	0.293	2.5	0.933
SP_1_CA1998	0.25	0.08	5.4	0.733	0.49	0.4	1.37	1.547	0.49	0.707	0.76	2.733
SP_1_PNS1999	0.74	0.253	2.68	1.16	0.68	0.333	2.62	1.173	0.74	0.307	3.31	1.44
SP_1_ASC1999	1.036	0.24	4.92	0.507	0.93	0.213	4.92	1.013	1.11	0.227	5.5	1.267
SP_1_MJR2003	1.3	0.53	5.14	1.627	0.93	0.587	1.68	1.4	1.05	0.827	1.21	1.12
SP_1_TD2000	0.72	0.24	3.12	3.173	0.56	0.253	2.31	0.76	0.83	0.24	3.33	0.973
SP_1_SRA2000	0.63	0.28	2.54	1.88	0.63	0.227	3.69	2.867	0.63	0.267	2.15	2.173
SP_1_MGI1998	0.68	0.227	3.91	1.227	0.68	0.267	2.23	1.16	0.63	0.307	2.34	1
SP_1_SD1996	0.68	0.493	1.52	1.093	0.52	0.32	1.88	0.907	0.42	0.413	1.07	0.613
SP_1_LH1998	0.83	0.347	2.6	3.093	1.09	0.36	3.18	1.453	1.09	0.333	3.75	1.76
SP_1_NGC2000	1.25	0.467	2.72	2.907	1.09	0.547	2.43	1.56	1.46	0.413	3.54	2
SP_1_PPO1999	1.2	0.253	3.13	2.613	1.56	0.547	2.67	3.587	0.99	0.36	3.26	2.027
SP_1_SEH2002	0.73	0.267	2.6	0.827	0.57	0.373	2.34	1.587	0.63	0.227	2.6	1.4
SP_1_CG1997	0.89	0.333	2.49	4.267	0.63	0.44	1.66	4.533	0.63	0.32	2.38	4.267
SP_1_MS2002	2.57	0.307	2.21	2.733	0.36	0.24	1.67	0.587	0.57	0.48	1.44	1.893
SP_1_MIN2001	0.89	1.88	0.46	3.533	0.83	1.24	0.67	2.827	0.99	0.547	2.01	2.12
SP_1_LR2002	0.57	0.973	0.92	2.04	0.47	0.44	1.71	1.16	0.42	0.347	1.85	0.973
SP_1_PS2003	0.47	0.387	1.35	0.787	0.68	0.36	2.17	0.827	0.52	0.387	1.74	1.853
SP_1_ARF1996	0.57	0.413	1.89	0.64	0.78	0.36	2.1	0.853	0.63	0.293	2.72	0.627
SP_1_IME2000	0.73	0.293	2.66	2.627	0.78	0.347	2.46	1.6	0.73	0.347	2.81	1.747
SP_1_MIR2000	0.79	0.467	2.13	2.307	0.63	0.347	2.34	1.227	0.68	0.307	2.21	2.347
SP_1_AGP2001	0.78	0.36	2.79	3.32	0.94	1.04	0.8	4.213	0.94	0.987	0.9	4.973
SP_1_CCR1999	0.78	0.56	1.58	3.573	0.83	0.44	2.32	1.147	0.78	0.453	2.32	1.44
SP_1_
SP_1_
SP_1_
SP_1_
SP_1_
SP_1_
SP_1_
SP_1_
SP_1_
SP_1_
SP_1_
SP_1_
SP_1_
SP_1_
SP_1_
SP_1_
SP_1_
SP_1_
SP_1_
SP_1_
SP_1_
SP_1_
SP_1_
SP_1_
SP_1_
SP_1_
SP_1_
SP_1_

## Sheet: Evaluator 2
CODE	CMV1Thickness	CMV1Rise Time	CMV1Speed	CMV1Contraction/Fatigue time	CMV2Thickness	CMV2Rise Time	CMV2Speed	CMV2Contraction/Fatigue time	CMV3Thickness	CMV3Rise Time	CMV3Speed	CMV3Contraction/Fatigue time		Legend
SP_2_LL2000	0.56	0.4	0.96	0.787	0.49	0.88	0.41	1.64	0.31	1.933	0.16	2.613		CM = Maximal Contraction
SP_2_SRM2002	0.74	0.533	1.74	10.707	0.68	0.227	2.45	3.507	0.74	0.24	3.34	2.387		CR = Repeated Contractions
SP_2_CAM2002	0.62	0.36	2.22	4.9	0.56	0.413	1.49	6.54	0.62	0.387	1.71	3.453		Tra = Transverse Contractions
SP_2_EG2000	1.17	0.48	2.57	1.613	1.05	0.653	1.61	2027	0.99	1.22	2.66	1.48		Epd = Right Lower Limb Elevation
SP_2_CPI1996	1.05	0.507	1.95	3.24	1.05	0.773	1.18	2.293	0.8	0.88	0.83	1.667
SP_2_NRZ1999	0.74	0.787	0.93	1.307	0.74	0.64	1.23	0.84	0.79	0.48	1.75	0.733
SP_2_EFP1999	0.35	0.84	0.29	1.4	0.4	0.827	0.54	1.653	0.59	0.733	0.74	2.307
SP_2_YEB1998	0.59	0.453	1.31	4.76	0.25	0.307	1.13	3.253	0.35	0.373	0.96	1.853
SP_2_EF1999	0.22	0.36	2.16	3.32	0.94	0.307	2.36	3.653	0.89	0.32	2.6	3.227
SP_2_MBV2003	0.74	1.147	0.7	1.427	0.74	0.867	0.93	1.8	0.86	1.147	0.76	1.52
SP_2_LRL2003	0.89	0.32	2.65	0.573	0.61	0.24	2.7	0.64	0.72	0.267	2.71	0.547
SP_2_ARC2003	1.06	0.573	1.98	0.84	1.17	0.52	2.3	0.707	1.11	0.44	2.69	1.227
SP_2_CA1998	0.49	0.44	0.93	1.2	0.31	0.293	0.84	1.64	0.37	0.947	0.46	1.44
SP_2_PNS1999	0.68	0.587	1.16	1.307	0.8	0.667	1.2	2.013	0.68	0.64	1.08	2.213
SP_2_ASC1999	0.99	0.16	5.89	3.4	0.93	0.227	4.01	2.64	0.68	0.253	2.68	0.76
SP_2_MJR2003	1.23	0.387	3.47	1.133	1.48	0.307	4.84	2.333	1.11	0.467	2.51	2.347
SP_2_TD2000	0.61	0.307	1.91	0.973	0.61	0.293	1.89	1	0.56	0.227	2.6	2
SP_2_SRA2000	1.04	0.307	3.91	1.2	0.83	0.253	3.13	1.253	0.83	0.4	2.29	1.773
SP_2_MGI1998	0.31	0.333	1.09	1.44	0.21	0.387	0.7	1.133	0.26	0.293	1.17	0.4
SP_2_SD1996	0.57	1.173	0.53	1.4	0.42	0.347	1.3	0.533	0.52	0.773	0.69	1.253
SP_2_LH1998	0.78	0.467	1.84	1.413	0.99	0.68	1.46	0.853	0.99	0.56	1.81	0.667
SP_2_NGC2000	0.83	0.8	0.98	2.413	1.41	0.827	1.64	1.107	0.94	0.24	3.91	0.48
SP_2_PPO1999	0.78	0.453	1.78	0.773	0.83	0.427	2.02	0.667	0.73	0.36	2.23	0.453
SP_2_SEH2002	0.47	0.32	1.3	1.867	0.47	0.333	1.41	1.267	0.63	0.693	1.05	1.653
SP_2_CG1997	0.68	0.32	2.12	0.56	0.73	0.293	2.66	0.587	0.63	0.28	2.23	1
SP_2_MS2002	0.63	0.747	0.91	2.8	0.68	1.067	0.63	3.227	0.73	0.64	1.22	3.707
SP_2_MIN2001	0.78	0.253	3.08	0.56	0.47	0.24	2.3	0.48	0.52	0.267	1.95	0.787
SP_2_LR2002	0.52	0.533	0.88	2.547	0.52	0.587	0.89	2.213	0.31	0.453	0.69	1.92
SP_2_PS2003	0.47	0.373	1.3	0.867	0.68	0.52	1.44	0.64	0.47	0.467	1.03	2.04
SP_2_ARF1996	1.04	0.387	2.69	0.68	1.09	0.573	2	0.893	0.94	0.533	1.76	0.747
SP_2_IME2000	0.63	0.52	1.37	1.827	0.68	0.253	2.67	0.587	0.68	0.28	2.54	0.973
SP_2_MIR2000	0.63	0.533	1.27	2.48	0.73	0.493	1.48	1.973	0.57	0.36	1.59	0.853
SP_2_AGP2001	0.78	1.573	0.46	3.427	0.52	0.853	0.67	1.84	0.68	2.04	0.33	3
SP_2_CCR1999	0.78	0.453	1.89	0.747	0.89	0.253	3.29	0.547	1.04	0.467	2.34	0.733
SP_2_
SP_2_
SP_2_
SP_2_
SP_2_
SP_2_
SP_2_
SP_2_
SP_2_
SP_2_
SP_2_
SP_2_
SP_2_
SP_2_
SP_2_
SP_2_
SP_2_
SP_2_
SP_2_
SP_2_
SP_2_
SP_2_
SP_2_
SP_2_
SP_2_
